# Supplementary material for: Refractive index and formaldehyde sensing with silver nanocubes
Source: Royal Society of Chemistry journal article supplement (doi:10.1039/d0ra10161c), 2021-01-01
Supplement: d0ra10161c1.pdf [file d0ra10161c1.pdf]

## Refractive index and formaldehyde sensing with silver nanocubes

Hemant Ramakant Hedge, Santhosh Chidangil and Rajeev K. Sinha\*

Department of Atomic and Molecular Physics, Manipal Academy of Higher Education, Manipal  
– 576104, Karnataka, India

\*Email: [rajeev.sinha@manipal.edu](mailto:rajeev.sinha@manipal.edu)

### Supplementary Materials

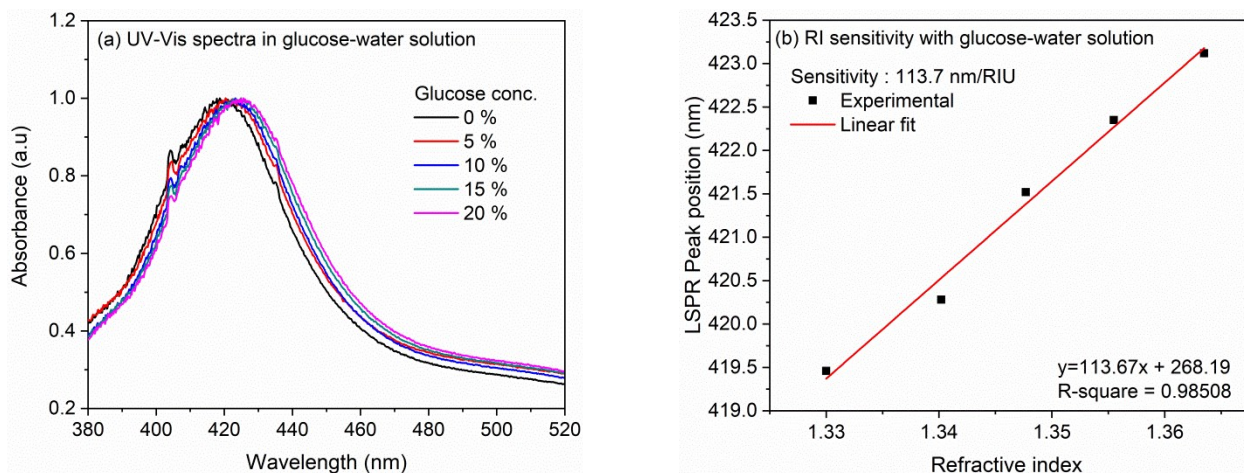

Figure S1. (a) UV-Vis spectra of silver nanocubes with glucose concentration from 0% to 20% (b) linearly fitted plot of LSPR band maxima versus refractive index of glucose solution. The 32 nm edge-length silver nanocubes were used in the study.
